# Supplementary material for: Aroylhydrazone Schiff Base Derived Cu(II) and V(V) Complexes: Efficient Catalysts towards Neat Microwave-Assisted Oxidation of Alcohols
Source: MDPI journal article supplement (doi:10.3390/ijms21082832), 2020-04-18
Supplement: s1 [file s1]

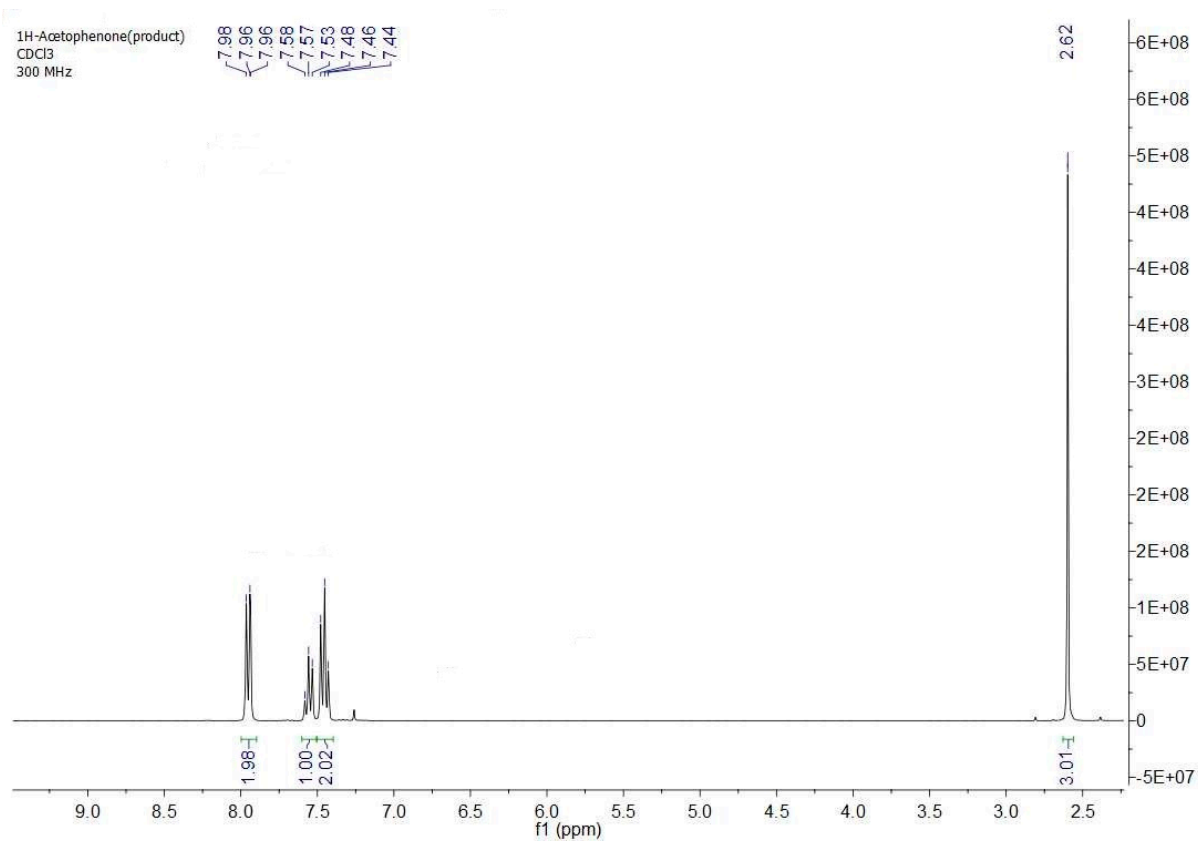

**Figure S1.** <sup>1</sup>H NMR spectrum of acetophenone (obtained from column chromatography).
